# Supplementary material for: A 16S rRNA gene sequencing and analysis protocol for the Illumina MiniSeq platform
Source: PubMed Central journal article supplement (PMC6291791; doi:10.1002/mbo3.611), 2018-03-25

Forward reads

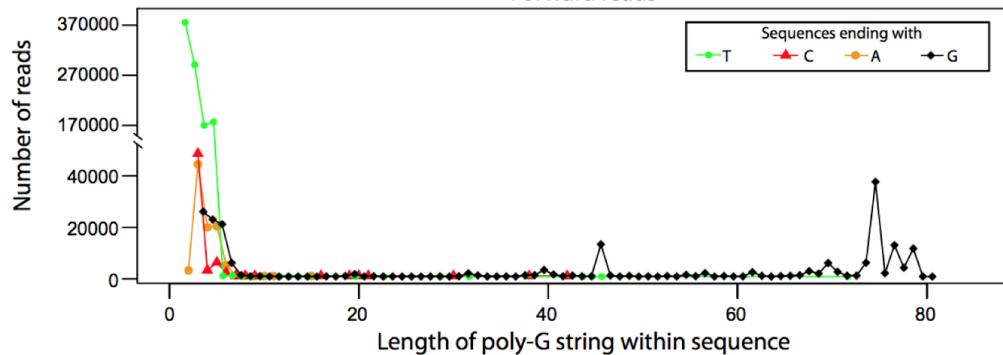

Reverse reads

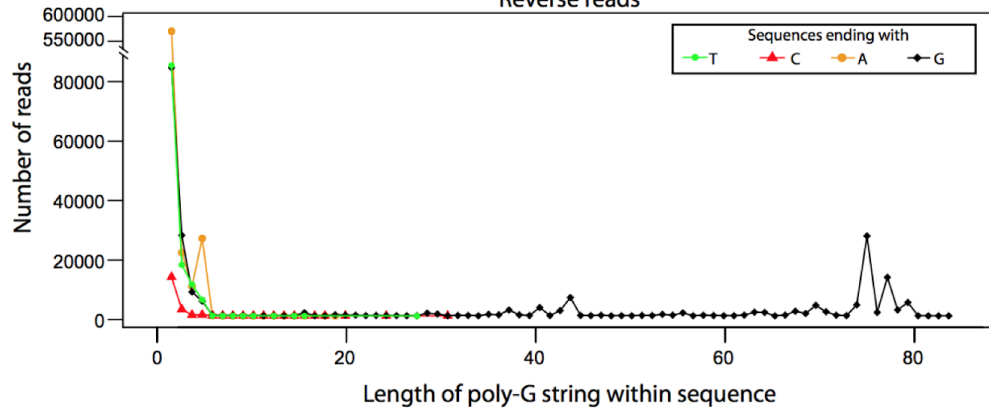

Supplement: MBO3-7-e00611-s001.pdf [file MBO3-7-e00611-s001.pdf]
