# Supplementary material for: A 16S rRNA gene sequencing and analysis protocol for the Illumina MiniSeq platform
Source: PubMed Central journal article supplement (PMC6291791; doi:10.1002/mbo3.611), 2018-03-25
Supplement: MBO3-7-e00611-s003.pdf [file MBO3-7-e00611-s003.pdf]

| Bacterial Isolate in mock community | Closest hit to GenBank entry          | Accession Number | Isolated from           | Author                          | Read numbers |       |        |
|-------------------------------------|---------------------------------------|------------------|-------------------------|---------------------------------|--------------|-------|--------|
|                                     |                                       |                  |                         |                                 | Run A        | Run C | Run D  |
| <i>Staphylococcus sp.</i>           | <i>Staphylococcus pasteurii</i>       | KX453962.1       | no information          | Smith et al. 2017               | 2,077        | 2,309 | 6,151  |
| <i>Bacillus sp.</i>                 | <i>Bacillus simplex</i>               | KX866679.1       | metal contaminated soil | Alaniz-Andrade et al. 2017      | 4,278        | 1,425 | 2,377  |
| <i>Bacillus sp.</i>                 | <i>Bacillus sp.</i>                   | KX785129.1       | no information          | Alnaimat 2016                   | 4,673        | 450   | 523    |
| <i>Micrococcus sp.</i>              | <i>Micrococcus luteus</i>             | KX866674.1       | metal contaminated soil | Alaniz-Andrade et al. 2017      | 3,204        | 633   | 581    |
| <i>Acinetobacter sp.</i>            | <i>Acinetobacter lwoffii</i>          | KX953868.1       | sediment                | Xiong et al. 2016               | 6,868        | 3,221 | 4,168  |
| <i>Enterobacter sp.</i>             | <i>Enterobacter sp.</i>               | KX364035.1       | Quebrada del Zoquete    | Cornejo et al. 2016             | 9,357        | 5,282 | 12,360 |
| <i>Aeromonas sp.</i>                | <i>Aeromonas veronii</i>              | KX946876.1       | no information          | Kang et al. 2016                | 10,169       | 5,964 | 17,779 |
| <i>Carnobacterium sp.</i>           | <i>Carnobacterium maltaromaticum</i>  | KU244600.1       | exfoliated sandstone    | Zanardini et al. 2016           | 2,514        | 1,882 | 3,834  |
| <i>Exiguobacterium sp.</i>          | <i>Exiguobacterium sibiricum</i>      | KR857420.1       | Siberian permafrost     | Schuerger et al. 2016           | 3,187        | 1,702 | 4,020  |
| <i>Janthinobacterium sp.</i>        | <i>Janthinobacterium sp.</i>          | LC189077.1       | farm soil               | Arif et al. 2017                | -            | -     | -      |
| <i>Pseudomonas sp.</i>              | <i>Pseudomonas fluorescens</i>        | KT695823.1       | Wyoming Soil            | Tao 2015                        | 2,735        | 3,548 | 4,084  |
| <i>Photobacterium sp.</i>           | <i>Photobacterium rosenbergii</i>     | KP843685.1       | coral mucus             | Embarcadero-Jimenez et al. 2015 | 5,938        | 2,082 | 4,916  |
| <i>Pseudoalteromonas sp.</i>        | <i>Pseudoalteromonas flavipulchra</i> | LC189370.1       | coral                   | Wijayanti et al. 2016           | 697          | 126   | 267    |
| <i>Vibrio sp.</i>                   | <i>Vibrio natriegens</i>              | KT986142.1       | ocean water             | Jiang et al. 2015               | 1,019        | 500   | 1,059  |
| <i>Rhodococcus sp.</i>              | <i>Rhodococcus sp.</i>                | KY970076.1       | soil                    | Chitranshi et al. 2017          | 558          | 171   | 110    |
| <i>Sphingobium sp.</i>              | <i>Sphingobium sp.</i>                | KY927392.1       | soil                    | Cai 2017                        | 38           | -     | 118    |
| <i>Arthrobacter sp.</i>             | <i>Arthrobacter sp.</i>               | KY970072.1       | soil                    | Chitranshi et al. 2017          | 48           | -     | -      |
| <i>Mycobacterium sp.</i>            | <i>Mycobacterium sp.</i>              | KX509812.1       | activated sludge        | Zhang and Yuan 2016             | 353          | 151   | 85     |
