# Supplementary material for: A 16S rRNA gene sequencing and analysis protocol for the Illumina MiniSeq platform
Source: PubMed Central journal article supplement (PMC6291791; doi:10.1002/mbo3.611), 2018-03-25
Supplement: MBO3-7-e00611-s004.pdf [file MBO3-7-e00611-s004.pdf]

| Run A (n= 45) |                 | Run B (n=88) |                 | Run C (n=84) |                 | Run D (n=90) |                 |
|---------------|-----------------|--------------|-----------------|--------------|-----------------|--------------|-----------------|
| Sample ID     | Number of reads | Sample ID    | Number of reads | Sample ID    | Number of reads | Sample ID    | Number of reads |
| RunA_S1       | 62624           | RunB_S1      | 903             | RunC_S1      | 52705           | RunD_S1      | 77382           |
| RunA_S2       | 74665           | RunB_S2      | 10448           | RunC_S2      | 40189           | RunD_S2      | 44442           |
| RunA_S3       | 96853           | RunB_S3      | 47252           | RunC_S3      | 44317           | RunD_S3      | 42990           |
| RunA_S4       | 26569           | RunB_S4      | 13438           | RunC_S4      | 40281           | RunD_S4      | 70156           |
| RunA_S5       | 25015           | RunB_S5      | 32902           | RunC_S5      | 29564           | RunD_S5      | 40760           |
| RunA_S6       | 34513           | RunB_S6      | 42514           | RunC_S6      | 56339           | RunD_S6      | 60442           |
| RunA_S7       | 28703           | RunB_S7      | 38340           | RunC_S7      | 67306           | RunD_S7      | 65848           |
| RunA_S8       | 29579           | RunB_S8      | 38333           | RunC_S8      | 45029           | RunD_S8      | 37629           |
| RunA_S9       | 37268           | RunB_S9      | 24188           | RunC_S9      | 70277           | RunD_S9      | 23115           |
| RunA_S10      | 43048           | RunB_S10     | 32288           | RunC_S10     | 60842           | RunD_S10     | 19623           |
| RunA_S11      | 45926           | RunB_S11     | 82384           | RunC_S11     | 68600           | RunD_S11     | 32095           |
| RunA_S12      | 15992           | RunB_S12     | 42174           | RunC_S12     | 53269           | RunD_S12     | 23154           |
| RunA_S13      | 14791           | RunB_S13     | 42422           | RunC_S13     | 48449           | RunD_S13     | 20503           |
| RunA_S14      | 11257           | RunB_S14     | 88214           | RunC_S14     | 57298           | RunD_S14     | 49803           |
| RunA_S15      | 15971           | RunB_S15     | 28259           | RunC_S15     | 53339           | RunD_S15     | 36020           |
| RunA_S16      | 12933           | RunB_S16     | 41928           | RunC_S16     | 54889           | RunD_S16     | 33545           |
| RunA_S17      | 51114           | RunB_S17     | 37282           | RunC_S17     | 64781           | RunD_S17     | 54064           |
| RunA_S18      | 108533          | RunB_S18     | 38427           | RunC_S18     | 61323           | RunD_S18     | 46676           |
| RunA_S19      | 83093           | RunB_S19     | 40759           | RunC_S19     | 60001           | RunD_S19     | 39764           |
| RunA_S20      | 62856           | RunB_S20     | 28059           | RunC_S20     | 72945           | RunD_S20     | 49826           |
| RunA_S21      | 54155           | RunB_S21     | 38081           | RunC_S21     | 82476           | RunD_S21     | 17649           |
| RunA_S22      | 58227           | RunB_S22     | 100269          | RunC_S22     | 48229           | RunD_S22     | 39956           |
| RunA_S23      | 57331           | RunB_S23     | 19246           | RunC_S23     | 70187           | RunD_S23     | 46447           |
| RunA_S24      | 69482           | RunB_S24     | 24480           | RunC_S24     | 23731           | RunD_S24     | 45222           |
| RunA_S25      | 12306           | RunB_S25     | 29927           | RunC_S25     | 41029           | RunD_S25     | 39645           |
| RunA_S26      | 12154           | RunB_S26     | 107917          | RunC_S26     | 49626           | RunD_S26     | 37400           |
| RunA_S27      | 17795           | RunB_S27     | 64135           | RunC_S27     | 36169           | RunD_S27     | 46212           |
| RunA_S28      | 34774           | RunB_S28     | 76448           | RunC_S28     | 37065           | RunD_S28     | 40735           |
| RunA_S29      | 19584           | RunB_S29     | 98246           | RunC_S29     | 35770           | RunD_S29     | 45999           |
| RunA_S30      | 30815           | RunB_S30     | 87179           | RunC_S30     | 55011           | RunD_S30     | 35807           |
| RunA_S31      | 38841           | RunB_S31     | 72001           | RunC_S31     | 41446           | RunD_S31     | 44480           |
| RunA_S32      | 33137           | RunB_S32     | 45491           | RunC_S32     | 44382           | RunD_S32     | 39174           |
| RunA_S33      | 34370           | RunB_S33     | 28360           | RunC_S33     | 30983           | RunD_S33     | 54194           |
| RunA_S34      | 39898           | RunB_S34     | 37259           | RunC_S34     | 63539           | RunD_S34     | 25674           |
| RunA_S35      | 38655           | RunB_S35     | 78820           | RunC_S35     | 75552           | RunD_S35     | 145             |
| RunA_S36      | 31711           | RunB_S36     | 8604            | RunC_S36     | 73336           | RunD_S36     | 26726           |
| RunA_S37      | 41549           | RunB_S37     | 22094           | RunC_S37     | 43057           | RunD_S37     | 45071           |
| RunA_S38      | 143835          | RunB_S38     | 38635           | RunC_S38     | 40319           | RunD_S38     | 46334           |
| RunA_S39      | 99682           | RunB_S39     | 58191           | RunC_S39     | 32651           | RunD_S39     | 38855           |
| RunA_S40      | 105959          | RunB_S40     | 22933           | RunC_S40     | 37460           | RunD_S40     | 26081           |
| RunA_S41      | 60506           | RunB_S41     | 93466           | RunC_S41     | 55309           | RunD_S41     | 49347           |
| RunA_S42      | 21486           | RunB_S42     | 13467           | RunC_S42     | 40375           | RunD_S42     | 19980           |
| RunA_S43      | 41261           | RunB_S43     | 34326           | RunC_S43     | 40542           | RunD_S43     | 35536           |
| RunA_S44      | 42373           | RunB_S44     | 36549           | RunC_S44     | 38441           | RunD_S44     | 31199           |
| RunA_S45      | 30657           | RunB_S45     | 27186           | RunC_S45     | 42819           | RunD_S45     | 27284           |
|               |                 | RunB_S46     | 35796           | RunC_S46     | 51529           | RunD_S46     | 20477           |
|               |                 | RunB_S47     | 28818           | RunC_S47     | 92500           | RunD_S47     | 34799           |
|               |                 | RunB_S48     | 40656           | RunC_S48     | 41511           | RunD_S48     | 43784           |
|               |                 | RunB_S49     | 12119           | RunC_S49     | 33872           | RunD_S49     | 35595           |
|               |                 | RunB_S50     | 658             | RunC_S50     | 41195           | RunD_S50     | 36919           |
|               |                 | RunB_S51     | 19830           | RunC_S51     | 48704           | RunD_S51     | 27295           |
|               |                 | RunB_S52     | 24256           | RunC_S52     | 37620           | RunD_S52     | 48307           |
|               |                 | RunB_S53     | 28472           | RunC_S53     | 276535          | RunD_S53     | 27292           |
|               |                 | RunB_S54     | 27282           | RunC_S54     | 47288           | RunD_S54     | 31990           |
|               |                 | RunB_S55     | 24263           | RunC_S55     | 29418           | RunD_S55     | 54744           |

|          |       |          |       |          |       |
|----------|-------|----------|-------|----------|-------|
| RunB_S56 | 20963 | RunC_S56 | 41442 | RunD_S56 | 37450 |
| RunB_S57 | 27840 | RunC_S57 | 37227 | RunD_S57 | 48802 |
| RunB_S58 | 11444 | RunC_S58 | 35556 | RunD_S58 | 29435 |
| RunB_S59 | 43028 | RunC_S59 | 37488 | RunD_S59 | 40799 |
| RunB_S60 | 13289 | RunC_S60 | 39816 | RunD_S60 | 36325 |
| RunB_S61 | 26108 | RunC_S61 | 53840 | RunD_S61 | 135   |
| RunB_S62 | 19343 | RunC_S62 | 31499 | RunD_S62 | 33337 |
| RunB_S63 | 13134 | RunC_S63 | 34086 | RunD_S63 | 44584 |
| RunB_S64 | 17771 | RunC_S64 | 43171 | RunD_S64 | 41374 |
| RunB_S65 | 19605 | RunC_S65 | 47683 | RunD_S65 | 36309 |
| RunB_S66 | 19720 | RunC_S66 | 33814 | RunD_S66 | 36774 |
| RunB_S67 | 19893 | RunC_S67 | 75834 | RunD_S67 | 28799 |
| RunB_S68 | 15535 | RunC_S68 | 30846 | RunD_S68 | 43452 |
| RunB_S69 | 39560 | RunC_S69 | 48541 | RunD_S69 | 35012 |
| RunB_S70 | 22353 | RunC_S70 | 42245 | RunD_S70 | 49785 |
| RunB_S71 | 70    | RunC_S71 | 49643 | RunD_S71 | 37114 |
| RunB_S72 | 25699 | RunC_S72 | 42148 | RunD_S72 | 32699 |
| RunB_S73 | 30478 | RunC_S73 | 46945 | RunD_S73 | 32342 |
| RunB_S74 | 9770  | RunC_S74 | 29452 | RunD_S74 | 31489 |
| RunB_S75 | 15375 | RunC_S75 | 21602 | RunD_S75 | 25181 |
| RunB_S76 | 3088  | RunC_S76 | 45180 | RunD_S76 | 36205 |
| RunB_S77 | 23934 | RunC_S77 | 42138 | RunD_S77 | 22767 |
| RunB_S78 | 23672 | RunC_S78 | 40285 | RunD_S78 | 35514 |
| RunB_S79 | 19002 | RunC_S79 | 58752 | RunD_S79 | 22931 |
| RunB_S80 | 13135 | RunC_S80 | 42129 | RunD_S80 | 35027 |
| RunB_S81 | 23816 | RunC_S81 | 40323 | RunD_S81 | 37786 |
| RunB_S82 | 14529 | RunC_S82 | 46586 | RunD_S82 | 32680 |
| RunB_S83 | 23296 | RunC_S83 | 50941 | RunD_S83 | 41451 |
| RunB_S84 | 14597 | RunC_S84 | 49194 | RunD_S84 | 33092 |
| RunB_S85 | 33670 |          |       | RunD_S85 | 39299 |
| RunB_S86 | 35730 |          |       | RunD_S86 | 31063 |
| RunB_S87 | 28797 |          |       | RunD_S87 | 388   |
| RunB_S88 | 22130 |          |       | RunD_S88 | 34466 |
|          |       |          |       | RunD_S89 | 36316 |
|          |       |          |       | RunD_S90 | 29444 |

---
