# Supplementary material for: A 16S rRNA gene sequencing and analysis protocol for the Illumina MiniSeq platform
Source: PubMed Central journal article supplement (PMC6291791; doi:10.1002/mbo3.611), 2018-03-25
Supplement: MBO3-7-e00611-s005.pdf [file MBO3-7-e00611-s005.pdf]

| <b>PCR Primer</b>  | <b>Barcode</b> | <b>Sequence (5' to 3')</b>                                           |
|--------------------|----------------|----------------------------------------------------------------------|
| <b>515F-Y.A501</b> | ATCGTACG       | AATGATACGGCGACCACCGAGATCTACACATCGTACGTATGGTAATTGTGTGYCAGCMGCCGCGGTAA |
| <b>515F-Y.A502</b> | ACTATCTG       | AATGATACGGCGACCACCGAGATCTACACACTATCTGTATGGTAATTGTGTGYCAGCMGCCGCGGTAA |
| <b>515F-Y.A503</b> | TAGCGAGT       | AATGATACGGCGACCACCGAGATCTACACTAGCGAGTTATGGTAATTGTGTGYCAGCMGCCGCGGTAA |
| <b>515F-Y.A504</b> | CTGCGTGT       | AATGATACGGCGACCACCGAGATCTACACCTGCGTGTATGGTAATTGTGTGYCAGCMGCCGCGGTAA  |
| <b>515F-Y.A505</b> | TCATCGAG       | AATGATACGGCGACCACCGAGATCTACACTCATCGAGTATGGTAATTGTGTGYCAGCMGCCGCGGTAA |
| <b>515F-Y.A506</b> | CGTGAGTG       | AATGATACGGCGACCACCGAGATCTACACCGTGAGTGTATGGTAATTGTGTGYCAGCMGCCGCGGTAA |
| <b>515F-Y.A507</b> | GGATATCT       | AATGATACGGCGACCACCGAGATCTACACGGATATCTTATGGTAATTGTGTGYCAGCMGCCGCGGTAA |
| <b>515F-Y.A508</b> | GACACCGT       | AATGATACGGCGACCACCGAGATCTACACGACACCGTTATGGTAATTGTGTGYCAGCMGCCGCGGTAA |
| <b>806RB.A701</b>  | AACTCTCG       | CAAGCAGAAGACGGCATAACGAGATAACTCTCGAGTCAGTCAGCCGGACTACNVGGGTWCTAAT     |
| <b>806RB.A702</b>  | ACTATGTC       | CAAGCAGAAGACGGCATAACGAGATACTATGTCAGTCAGTCAGCCGGACTACNVGGGTWCTAAT     |
| <b>806RB.A703</b>  | AGTAGCGT       | CAAGCAGAAGACGGCATAACGAGATAGTAGCGTAGTCAGTCAGCCGGACTACNVGGGTWCTAAT     |
| <b>806RB.A704</b>  | CAGTGAGT       | CAAGCAGAAGACGGCATAACGAGATCAGTGAGTAGTCAGTCAGCCGGACTACNVGGGTWCTAAT     |
| <b>806RB.A705</b>  | CGTACTCA       | CAAGCAGAAGACGGCATAACGAGATCGTACTCAAGTCAGTCAGCCGGACTACNVGGGTWCTAAT     |
| <b>806RB.A706</b>  | CTACGCAG       | CAAGCAGAAGACGGCATAACGAGATCTACGCAGAGTCAGTCAGCCGGACTACNVGGGTWCTAAT     |
| <b>806RB.A707</b>  | GGAGACTA       | CAAGCAGAAGACGGCATAACGAGATGGAGACTAAGTCAGTCAGCCGGACTACNVGGGTWCTAAT     |
| <b>806RB.A708</b>  | GTCGCTCG       | CAAGCAGAAGACGGCATAACGAGATGTCGCTCGAGTCAGTCAGCCGGACTACNVGGGTWCTAAT     |
| <b>806RB.A709</b>  | GTCGTAGT       | CAAGCAGAAGACGGCATAACGAGATGTCGTAGTAGTCAGTCAGCCGGACTACNVGGGTWCTAAT     |
| <b>806RB.A710</b>  | TAGCAGAC       | CAAGCAGAAGACGGCATAACGAGATTAGCAGACAGTCAGTCAGCCGGACTACNVGGGTWCTAAT     |
| <b>806RB.A711</b>  | TCATAGAC       | CAAGCAGAAGACGGCATAACGAGATTCATAGACAGTCAGTCAGCCGGACTACNVGGGTWCTAAT     |
| <b>806RB.A712</b>  | TCGCTATA       | CAAGCAGAAGACGGCATAACGAGATTCGCTATAAGTCAGTCAGCCGGACTACNVGGGTWCTAAT     |
